# Supplementary material for: Phosphorus Starvation- and Zinc Excess-Induced Astragalus sinicus AsZIP2 Zinc Transporter Is Suppressed by Arbuscular Mycorrhizal Symbiosis
Source: MDPI journal article supplement (doi:10.3390/jof7110892), 2021-10-22
Supplement: s1 [file s1]

## Supporting Information

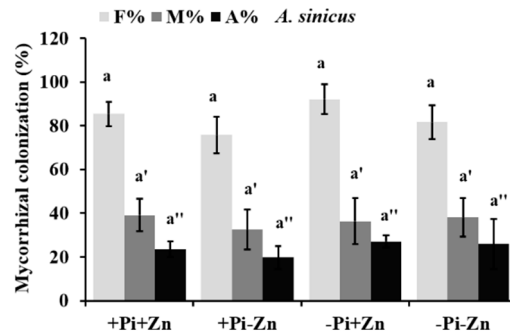

**Figure S1.** Effect of the external Pi and Zn availabilities on the arbuscular mycorrhizal symbiosis in *A. sinicus*. *A. sinicus* were grown in pot cultures treated with 300  $\mu$ M Pi and 50  $\mu$ M Zn (+Pi+Zn), 300  $\mu$ M Pi and 0.5  $\mu$ M Zn (+Pi-Zn), 30  $\mu$ M Pi and 50  $\mu$ M Zn (-Pi+Zn) or 30  $\mu$ M Pi and 0.5  $\mu$ M Zn (-Pi-Zn). 14-d-old *A. sinicus* seedling roots were colonized by *R. irregularis* at 42 dpi, and colonization level was quantified in roots of 56-d-old mycorrhizal plants after WGA488 staining. F%, the total colonization frequency; M%, the percentage of mycorrhizal intensity; A%, the percentage of arbuscule abundance. Error bars represent the SD for means of three biological replicates. The same letters indicate non-significant differences at  $P < 0.05$ , based on the Duncan's multiple range test.

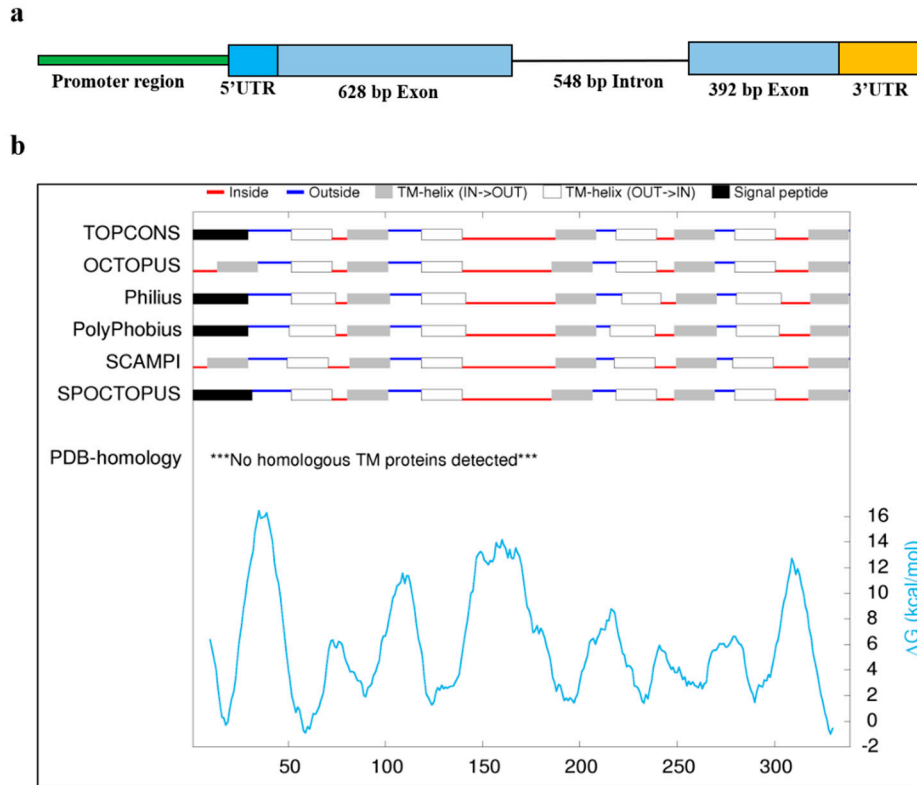

**Figure S2.** Gene structure and topology analysis of *A. sinicus* AsZIP2. (a) The AsZIP2 gene corresponds to MZ636517 and consists of two exons (light blue boxes). The dark blue and orange boxes are represented 5'UTR and 3'UTR regions of AsZIP2, respectively. The green line upstream of the 5'UTR represents the promoter region of AsZIP2. (b) The encoded membrane protein AsZIP2 from *A. sinicus* comprises 339 amino acids and 8 transmembrane domains (TM-helices). The TOPCONS program (<http://topcons.cbr.su.se/>) predicts that AsZIP2 (QYE52148) is a membrane intrinsic protein containing 8 TM domains.

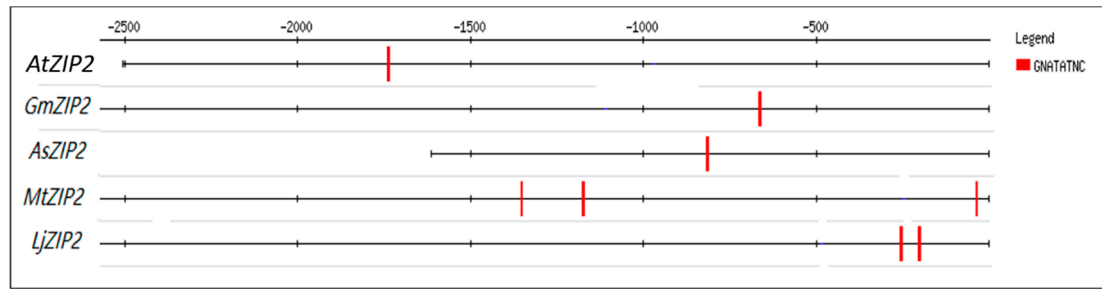

**Figure S3.** The P1BS-motif is present in the promoters of the *AsZIP2* from *A. sinicus* as well as the ZIP2 subfamily genes from other plant species. The P1BS-motif (GNATATNC), which is the binding site of the PHR1 and PHR1-like transcription factors in plants, was screened in the promoter regions of the plant ZIP2 subfamily genes by the DNA-pattern matching analysis (<http://rsat.ulb.ac.be/rsat/>). The GNATATNC motif is found in the promoter regions of *AtZIP2* (in *Arabidopsis thaliana*), *GmZIP2* (in *Glycine max*), *AsZIP2* (in *A. sinicus*), *MtZIP2* (in *Medicago truncatula*), and *LjZIP2* (in *Lotus japonicus*), whereas these promoter sequences do not contain the RTGTCGACAY motif, which is directly activated by the bZIP19/23 transcription factors during Zn starvation.

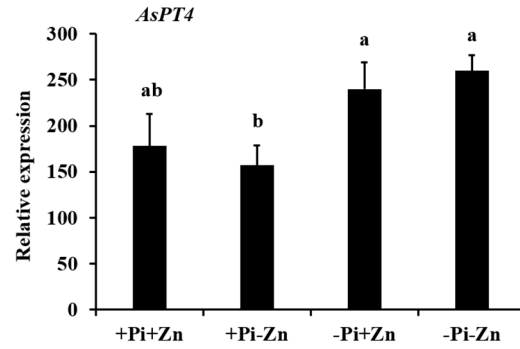

**Figure S4.** Transcription of the arbuscular mycorrhiza-specific *AsPT4* in mycorrhizal roots of *A. sinicus* in response to Pi and Zn availabilities. The 56-d-old *A. sinicus* roots with *R. irregularis* were harvested and transcription levels of *AsPT4* was estimated by real-time qRT-PCR. *AsActin* for *A. sinicus* was used as the house-keeping gene for normalization. Error bars represents SD from three biological replicates. The different letters indicate statistically significant differences among treatments at  $P < 0.05$ , based on Duncan's multiple range test.

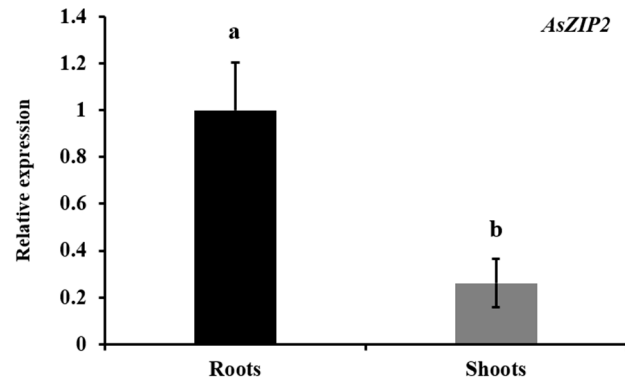

**Figure S5.** Transcription profiles of *AsZIP2* in the roots and shoots of *A. sinicus*. *A. sinicus* plants were grown under standard (300  $\mu$ M Pi and 1  $\mu$ M Zn) conditions. 56-d-old roots and shoots of *A. sinicus* plants were collected separately and transcript levels of *AsZIP2* was quantified by real-time qRT-PCR. The *AsActin* gene for *A. sinicus* was used as the internal control. Error bars mean standard deviation from three biological replicates. The different letters are statistically significant differences between roots and shoots at  $P < 0.05$ , based on Student's t-test.

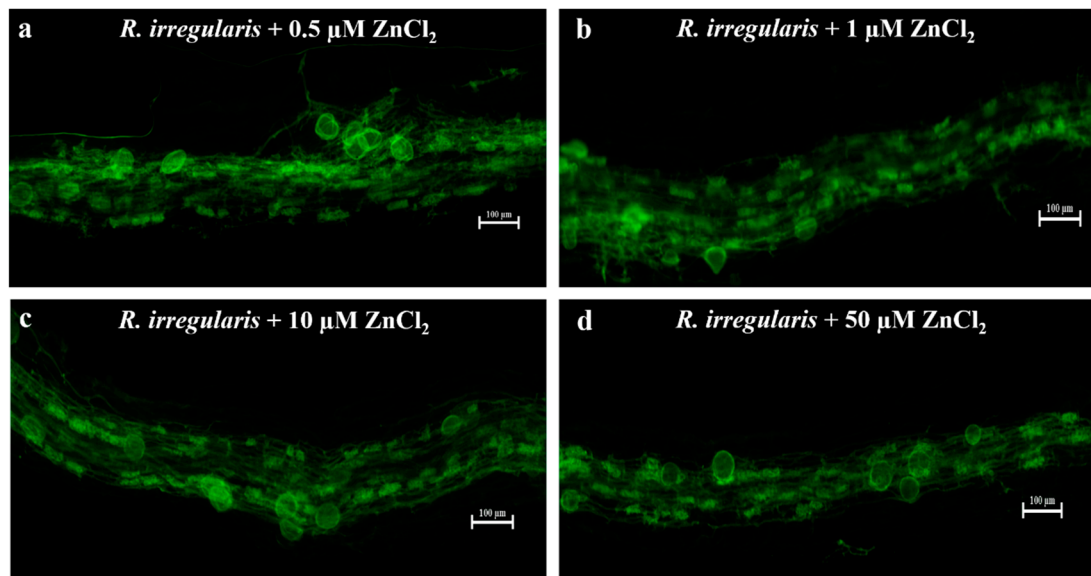

**Figure S6. Effect of the external Zn concentrations on the AM symbiosis in *A. sinicus* roots.** (a-d) The 56-day-old *A. sinicus* plants were grown in cultures supplied with 0.5, 1, 10, or 50  $\mu\text{M}$   $\text{ZnCl}_2$  concentrations, and these *A. sinicus* roots were colonized by *R. irregularis*. Fluorescence images of *R. irregularis* within roots of *A. sinicus* exposed to different Zn concentrations as indicated above. AM roots were stained with WGA488. Scale bars, 100  $\mu\text{m}$ .

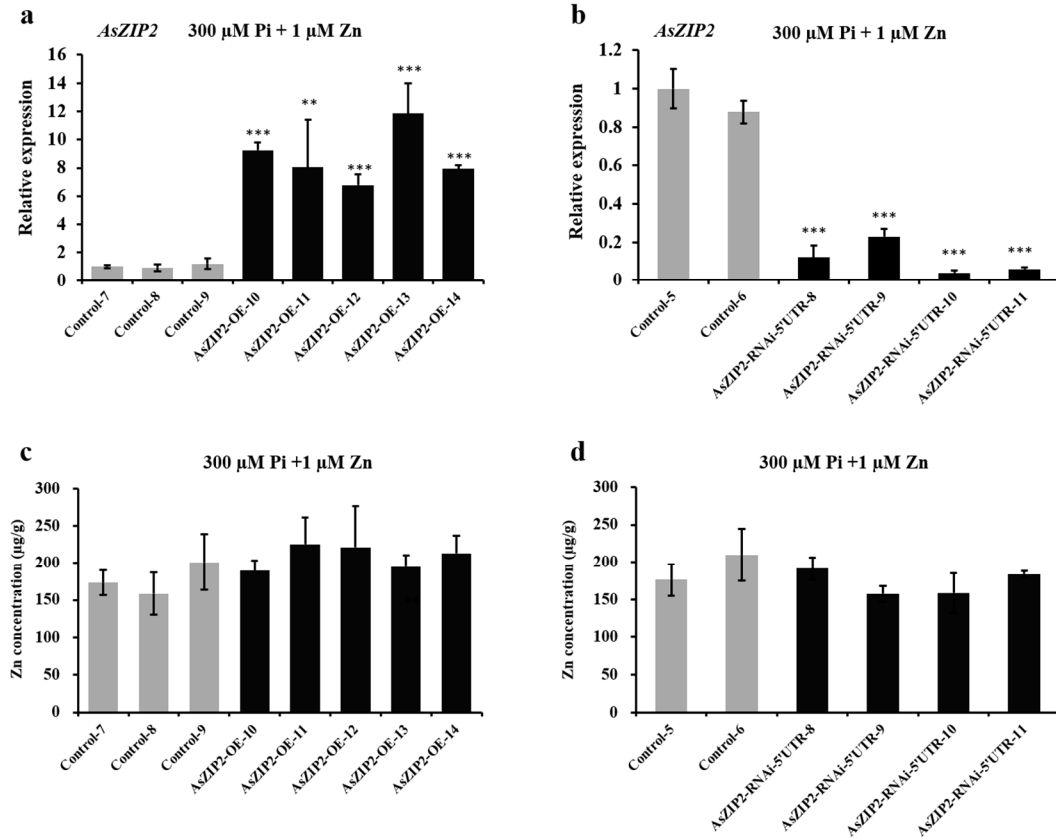

**Figure S7. Effect of the *AsZIP2*-overexpression (*AsZIP2*-OE) and *AsZIP2*-silencing (*AsZIP2*-RNAi) on the Zn concentration in roots of *A. sinicus* under standard growth conditions.** (a and b) Molecular phenotypes in the transgenic *A. sinicus* roots during standard growth (300 μM Pi and 1 μM ZnCl<sub>2</sub>) conditions. Real time qRT-PCR analysis of *AsZIP2* expression in the *AsZIP2*-OE (a) and *AsZIP2*-RNAi (b) lines compared with the control lines. *AsActin* from *A. sinicus* served as the endogenous control. (c) The Zn concentrations in the control and *AsZIP2*-OE roots of 56-d-old *A. sinicus* plants under standard growth conditions. (d) The Zn concentrations in the control and *AsZIP2*-RNAi roots of 56-d-old *A. sinicus* plants under standard growth conditions. Error bars represented the SD for means of three technical replicates. Significant differences between the *AsZIP2*-OE (or *AsZIP2*-RNAi) and controls: \*\*\*,  $P < 0.001$ ; \*\*,  $P < 0.01$ ; Student's t-test.

**Table S1.** A list of the primers used in this study.

| Primer names          | Primer sequences (from 5' to 3')                                   | Use for                                |
|-----------------------|--------------------------------------------------------------------|----------------------------------------|
| <i>AsZIPF1</i>        | CAAAACCCTAAAGTCAAC                                                 | Degenerate primers                     |
| <i>AsZIPR1</i>        | TCAATCCCAAATCATGACAAC                                              | Degenerate primers                     |
| <i>AsZIPF4</i>        | GTGACACTATTCTTCTCATCCTTGC                                          | RT-PCR primers                         |
| <i>AsZIPR3</i>        | CTCCATGCTTCCCCTTTAGTACCTG                                          | RT-PCR primers                         |
| <i>AsZIPF4</i>        | GTGACACTATTCTTCTCATCCTTGC                                          | 3'RACE primers                         |
| <i>AsZIPF5</i>        | CTTAGGATGTTACCAAAG                                                 | 3'RACE primers                         |
| <i>AsZIPR4</i>        | CCACAACCTTATCTTCCCTCTG                                             | TAIL-PCR primers                       |
| <i>AsZIPR5</i>        | GAAGAAAAGTCTCATTCCAACC                                             | TAIL-PCR primers                       |
| <i>AsZIPR6</i>        | CTGAATCACCGTGTCTCCATGACC                                           | TAIL-PCR primers                       |
| <i>AsZIPPF</i>        | <u>GGGGACAAGTTTGTACAAAAAAGCAGGCT</u> CAAGTCGCGTCTGCATCT<br>AGAGC   | Promoter analysis primers              |
| <i>AsZIPPR</i>        | <u>GGGGACCACTTTGTACAAGAAAGCTGGGT</u> GAATGTGTGTACGTATTT<br>TTCTCTC | Promoter analysis primers              |
| <i>AsInvF1</i>        | GGTGGTGTGTCTCCTTACTTC                                              | Inverse PCR primers                    |
| <i>AsInvF2</i>        | CTTGAGTGATTCCAATGAAACCT                                            | Inverse PCR primers                    |
| <i>AsZIPR7</i>        | CTGAATCACCGTGTCTCCATGACC                                           | Inverse PCR primers                    |
| <i>AsZIPR8</i>        | TTGGTTTTGGAGGATGAAGCC                                              | Inverse PCR primers                    |
| <i>AsZIP2-OE-F</i>    | GGGGTACCATGGCTTCATCCTCCAAAACCAAAG                                  | Overexpression primers                 |
| <i>AsZIP2-OE-R</i>    | CGCGGATCCTCAATCCCAAATCATTACAAC                                     | Overexpression primers                 |
| <i>AsZIP2-ORFF1</i>   | <u>GGGGACAAGTTTGTACAAAAAAGCAGGCT</u> ATGGCTTCATCCTCCAAA<br>ACCAAAG | Subcellular localization<br>in tobacco |
| <i>AsZIP2-ORFR1</i>   | <u>GGGGACCACTTTGTACAAGAAAGCTGGGT</u> TATCCCAAATCATTACAA<br>C       |                                        |
| <i>AsZIP2-Ri-5'-F</i> | <u>GGGGACAAGTTTGTACAAAAAAGCAGGCT</u> CTAGTACAAGTAATACAA<br>TTGTAC  | RNAi primers                           |
| <i>AsZIP2-Ri-5'-R</i> | <u>GGGGACCACTTTGTACAAGAAAGCTGGGT</u> CCAAAACCAAAGCCCTAA<br>AGTC    | RNAi primers                           |
| AD1                   | ATGGACTCCAGAGCGGCCGC (G/C/A)N(G/C/A)NNNGGAA                        | TAIL-PCR long adapters                 |
| AD2                   | ATGGACTCCAGAGCGGCCGC (G/C/T)N(G/C/T)NNNGGTT                        | TAIL-PCR long adapters                 |
| AD3                   | ATGGACTCCAGAGCGGCCGC (G/C/A)(G/C/A)N(G/C/A)NNNCCAA                 | TAIL-PCR long adapters                 |
| AD4                   | ATGGACTCCAGAGCGGCCGC (G/C/T)(G/A/T)N(G/C/T)NNNCGGT                 | TAIL-PCR long adapters                 |
| <i>AsZIP2-qF</i>      | GTGACACTATTCTTCTCATCCTTGC                                          | Real time qRT-PCR                      |
| <i>AsZIP2-qR</i>      | CTCCATGCTTCCCCTTTAGTACCTG                                          | Real time qRT-PCR                      |
| <i>AsPT2-qF</i>       | TCCTGCTGCTCTTACCTTCTACTG                                           | Real time qRT-PCR                      |
| <i>AsPT2-qR</i>       | CCTCACTCAACTCCTGCACCTT                                             | Real time qRT-PCR                      |
| <i>AsPT3-qF</i>       | CCTTTGGATTCTCTATGCTC                                               | Real time qRT-PCR                      |
| <i>AsPT3-qR</i>       | TTTTCTTTAGATTTCAGGCAC                                              | Real time qRT-PCR                      |
| <i>AsPT4-qF</i>       | CAGAAACAAAGGGAAGATCATTGG                                           | Real time qRT-PCR                      |
| <i>AsPT4-qR</i>       | CATGTAATTCAGATCCTTCACACTG                                          | Real time qRT-PCR                      |
| <i>AsActin-qF</i>     | GTTCTTTTCCAGCCTTCTATGA                                             | <i>A. sinicus</i> housekeeping gene    |
| <i>AsActin-qR</i>     | ATGTTTCCGTACAGATCCTTTC                                             | for qRT-PCR                            |



**Table S2.** The accession numbers of the plant ZIP family proteins used in this study.

| Gene names | Accession Numbers | Species                            |
|------------|-------------------|------------------------------------|
| AsZIP2     | QYE52148          | <i>Astragalus sinicus</i>          |
| MtZIP2     | XP_003597387.1    | <i>Medicago truncatula</i>         |
| LjZIP2     | AFK49261.1        | <i>Lotus japonicus</i>             |
| AtZIP2     | NP_200760.1       | <i>Arabidopsis thaliana</i>        |
| OsZIP1     | XP_015633357.1    | <i>Oryza sativa Japonica Group</i> |
| OsZIP2     | XP_015628224.1    | <i>Oryza sativa Japonica Group</i> |
| PtZIP11    | XP_002300374.2    | <i>Populus trichocarpa</i>         |
| PtZIP12    | XP_006369999.2    | <i>Populus trichocarpa</i>         |
| SlZIP2     | NP_001234349.1    | <i>Solanum lycopersicum</i>        |
| AtZIP11    | NP_564703.1       | <i>Arabidopsis thaliana</i>        |
| MtZIP11    | XP_013460015.1    | <i>Medicago truncatula</i>         |
| GmZIP11    | XP_003532170.1    | <i>Glycine max</i>                 |
| GmZIP13    | XP_006602141.1    | <i>Glycine max</i>                 |
| GmZIP14    | XP_003551465.1    | <i>Glycine max</i>                 |
| GmZIP7     | XP_003547009.1    | <i>Glycine max</i>                 |
| GmZIP3     | NP_001304414.2    | <i>Glycine max</i>                 |
| GmZIP2     | XP_003543520.3    | <i>Glycine max</i>                 |
| MtZIP6     | XP_003615761.1    | <i>Medicago truncatula</i>         |
| GmZIP6     | XP_003544893.1    | <i>Glycine max</i>                 |
| PtZIP6     | XP_002299993.1    | <i>Populus trichocarpa</i>         |
| SlZIP6     | XP_010321288.1    | <i>Solanum lycopersicum</i>        |
| AtZIP6     | NP_180569.1       | <i>Arabidopsis thaliana</i>        |
| OsZIP6     | XP_015640855.1    | <i>Oryza sativa Japonica Group</i> |
| AtZIP7     | NP_178488.1       | <i>Arabidopsis thaliana</i>        |
| GmIRT1     | XP_003520144.1    | <i>Glycine max</i>                 |
| MtIRT2     | XP_024628929.2    | <i>Medicago truncatula</i>         |
| SlIRT3     | XP_019067417.1    | <i>Solanum lycopersicum</i>        |
| GmZIP10    | NP_001240277.1    | <i>Glycine max</i>                 |
| GmZIP12    | NP_001274385.1    | <i>Glycine max</i>                 |
| MtIRT1     | XP_003607852.1    | <i>Medicago truncatula</i>         |
| AtZIP8     | Q8S3W4.1          | <i>Arabidopsis thaliana</i>        |
| AtIRT1     | NP_567590.3       | <i>Arabidopsis thaliana</i>        |
| SlIRT2     | NP_567590.3       | <i>Solanum lycopersicum</i>        |
| AtZIP10    | NP_174411.2       | <i>Arabidopsis thaliana</i>        |
| SlIRT1     | NP_001234248.1    | <i>Solanum lycopersicum</i>        |
| OsZIP10    | XP_015641360.1    | <i>Oryza sativa Japonica Group</i> |
| OsZIP7     | XP_015637712.1    | <i>Oryza sativa Japonica Group</i> |
| SlZIP4     | XP_004245100.1    | <i>Solanum lycopersicum</i>        |
| AtZIP9     | NP_195028.1       | <i>Arabidopsis thaliana</i>        |
| AtZIP4     | NP_001318977.1    | <i>Arabidopsis thaliana</i>        |
| PtZIP4     | XP_002324173.2    | <i>Populus trichocarpa</i>         |
| MtZIP4     | XP_003603149.3    | <i>Medicago truncatula</i>         |
| GmZIP4     | XP_006581291.1    | <i>Glycine max</i>                 |
| GmZIP5     | XP_003526000.2    | <i>Glycine max</i>                 |
| MtZIP5     | XP_013461166.1    | <i>Medicago truncatula</i>         |
| MtZIP8     | XP_013461171.1    | <i>Medicago truncatula</i>         |
| MtZIP5.1   | XP_003601469.1    | <i>Medicago truncatula</i>         |
| MtZIP8.1   | XP_024635724.1    | <i>Medicago truncatula</i>         |
| SlZIP5     | XP_004243896.1    | <i>Solanum lycopersicum</i>        |
| SlZIP7     | XP_004243649.1    | <i>Solanum lycopersicum</i>        |
| SlZIP8     | XP_004231600.1    | <i>Solanum lycopersicum</i>        |
| PtZIP8     | XP_002307860.3    | <i>Populus trichocarpa</i>         |
| PtZIP2     | XP_002312231.2    | <i>Populus trichocarpa</i>         |
| PtZIP3     | XP_002315075.2    | <i>Populus trichocarpa</i>         |
| AtZIP1     | NP_187881.1       | <i>Arabidopsis thaliana</i>        |
| MtZIP1     | XP_013464193.1    | <i>Medicago truncatula</i>         |
| GmZIP1     | XP_003531480.1    | <i>Glycine max</i>                 |

---

|        |                |                                    |
|--------|----------------|------------------------------------|
| GmZIP8 | XP_040865466.1 | <i>Glycine max</i>                 |
| GmZIP9 | XP_003546826.1 | <i>Glycine max</i>                 |
| OsZIP8 | XP_015644611.1 | <i>Oryza sativa Japonica Group</i> |
| OsZIP9 | XP_015637508.1 | <i>Oryza sativa Japonica Group</i> |
| OsZIP5 | XP_015637510.1 | <i>Oryza sativa Japonica Group</i> |
| OsZIP3 | XP_015635611.1 | <i>Oryza sativa Japonica Group</i> |
| OsZIP4 | XP_015650399.1 | <i>Oryza sativa Japonica Group</i> |

---
